# Supplementary material for: Assessment of Short-term Morbidity and Mortality in Patients with Decompensated Liver Disease in the Suez Canal Area
Source: Research Square preprint supplement (doi:10.21203/rs.3.rs-8542982/v1), 2026-02-09
Supplement: Supplementary file 1 [file da057be9ed3c26edc85b76f5.docx]

**References**

1. Hu S, Zeng W, Zhang W, et al. KIAA0101 as a new diagnostic and prognostic marker, and its correlation with gene regulatory networks and immune infiltrates in lung adenocarcinoma. Aging (Albany NY) [Internet]. 2020;13(1):301–39. Available from: http://dx.doi.org/10.18632/aging.104144

2. Tapper EB, Parikh ND. Diagnosis and Management of Cirrhosis and Its Complications. JAMA [Internet]. 2023;329(18):1589. Available from: http://dx.doi.org/10.1001/jama.2023.5997

3. Moon AM, Singal AG, Tapper EB. Contemporary Epidemiology of Chronic Liver Disease and Cirrhosis. Clin Gastroenterol Hepatol [Internet]. 2020;18(12):2650–66. Available from: http://dx.doi.org/10.1016/j.cgh.2019.07.060

4. D’Amico G, Bernardi M, Angeli P. Towards a new definition of decompensated cirrhosis. J Hepatol [Internet]. 2022;76(1):202–7. Available from: http://dx.doi.org/10.1016/j.jhep.2021.06.018

5. Biggins SW, Angeli P, Garcia‐Tsao G, et al. Diagnosis, Evaluation, and Management of Ascites, Spontaneous Bacterial Peritonitis and Hepatorenal Syndrome: 2021 Practice Guidance by the American Association for the Study of Liver Diseases. Hepatology [Internet]. 2021;74(2):1014–48. Available from: http://dx.doi.org/10.1002/hep.31884

6. ZHANG Q, GUO X, ZHAO S, et al. Prognostic performance of clinical indices and model scorings for acute-on-chronic liver failure: A study of 164 patients. Exp Ther Med [Internet]. 2016;11(4):1348–54. Available from: http://dx.doi.org/10.3892/etm.2016.3037

7. Ridola L, Faccioli J, Nardelli S, et al. Hepatic encephalopathy: Diagnosis and management. J Transl Intern Med [Internet]. 2020;8(4):210–9. Available from: http://dx.doi.org/10.2478/jtim-2020-0034

8. Abbasy M, Zaghla H, Elhelbawy M, et al. Predicting in-hospital mortality of cirrhotic patients hospitalized with hepatic encephalopathy. Egypt Liver J [Internet]. 2022;12(1). Available from: http://dx.doi.org/10.1186/s43066-022-00178-z

9. Elbahrawy A, Ibrahim MK, Eliwa A, et al. Current situation of viral hepatitis in Egypt. Microbiol Immunol [Internet]. 2021;65(9):352–72. Available from: http://dx.doi.org/10.1111/1348-0421.12916

10. Garcia‐Tsao G, Abraldes JG, Berzigotti A, et al. Portal hypertensive bleeding in cirrhosis. Hepatology [Internet]. 2017;65(1):310–35. Available from: http://dx.doi.org/10.1002/hep.28906

11. A Patel S, Shastri K, Patel S, et al. A STUDY OF CHILD PUGH SCORE VS MELD SCORE FOR ASSESSMENT OF PROGNOSIS IN LIVER CIRRHOSIS. Glob J Res Anal [Internet]. 2023;94–6. Available from: http://dx.doi.org/10.36106/gjra/3507597

12. Zhang Z, Maddukuri G, Jaipaul N, et al. Role of renal replacement therapy in patients with type 1 hepatorenal syndrome receiving combination treatment of vasoconstrictor plus albumin. J Crit Care [Internet]. 2015;30(5):969–74. Available from: http://dx.doi.org/10.1016/j.jcrc.2015.05.006

13. Grzegorzewski J, Bartsch F, Köller A, et al. Pharmacokinetics of Caffeine: A Systematic Analysis of Reported Data for Application in Metabolic Phenotyping and Liver Function Testing. Front Pharmacol [Internet]. 2022;12. Available from: http://dx.doi.org/10.3389/fphar.2021.752826

14. Kennedy OJ, Fallowfield JA, Poole R, et al. All coffee types decrease the risk of adverse clinical outcomes in chronic liver disease: a UK Biobank study. BMC Public Health [Internet]. 2021;21(1). Available from: http://dx.doi.org/10.1186/s12889-021-10991-7

15. Khan S, Linganna M. Diagnosis and management of ascites, spontaneous bacterial peritonitis, and hepatorenal syndrome. Cleve Clin J Med [Internet]. 2023;90(4):209–13. Available from: http://dx.doi.org/10.3949/ccjm.90a.22028
